# Supplementary material for: Comparative genomics of the major fungal agents of human and animal Sporotrichosis: Sporothrix schenckii and Sporothrix brasiliensis
Source: PubMed Central journal article supplement (PMC4226871; doi:10.1186/1471-2164-15-943), 2014-10-29

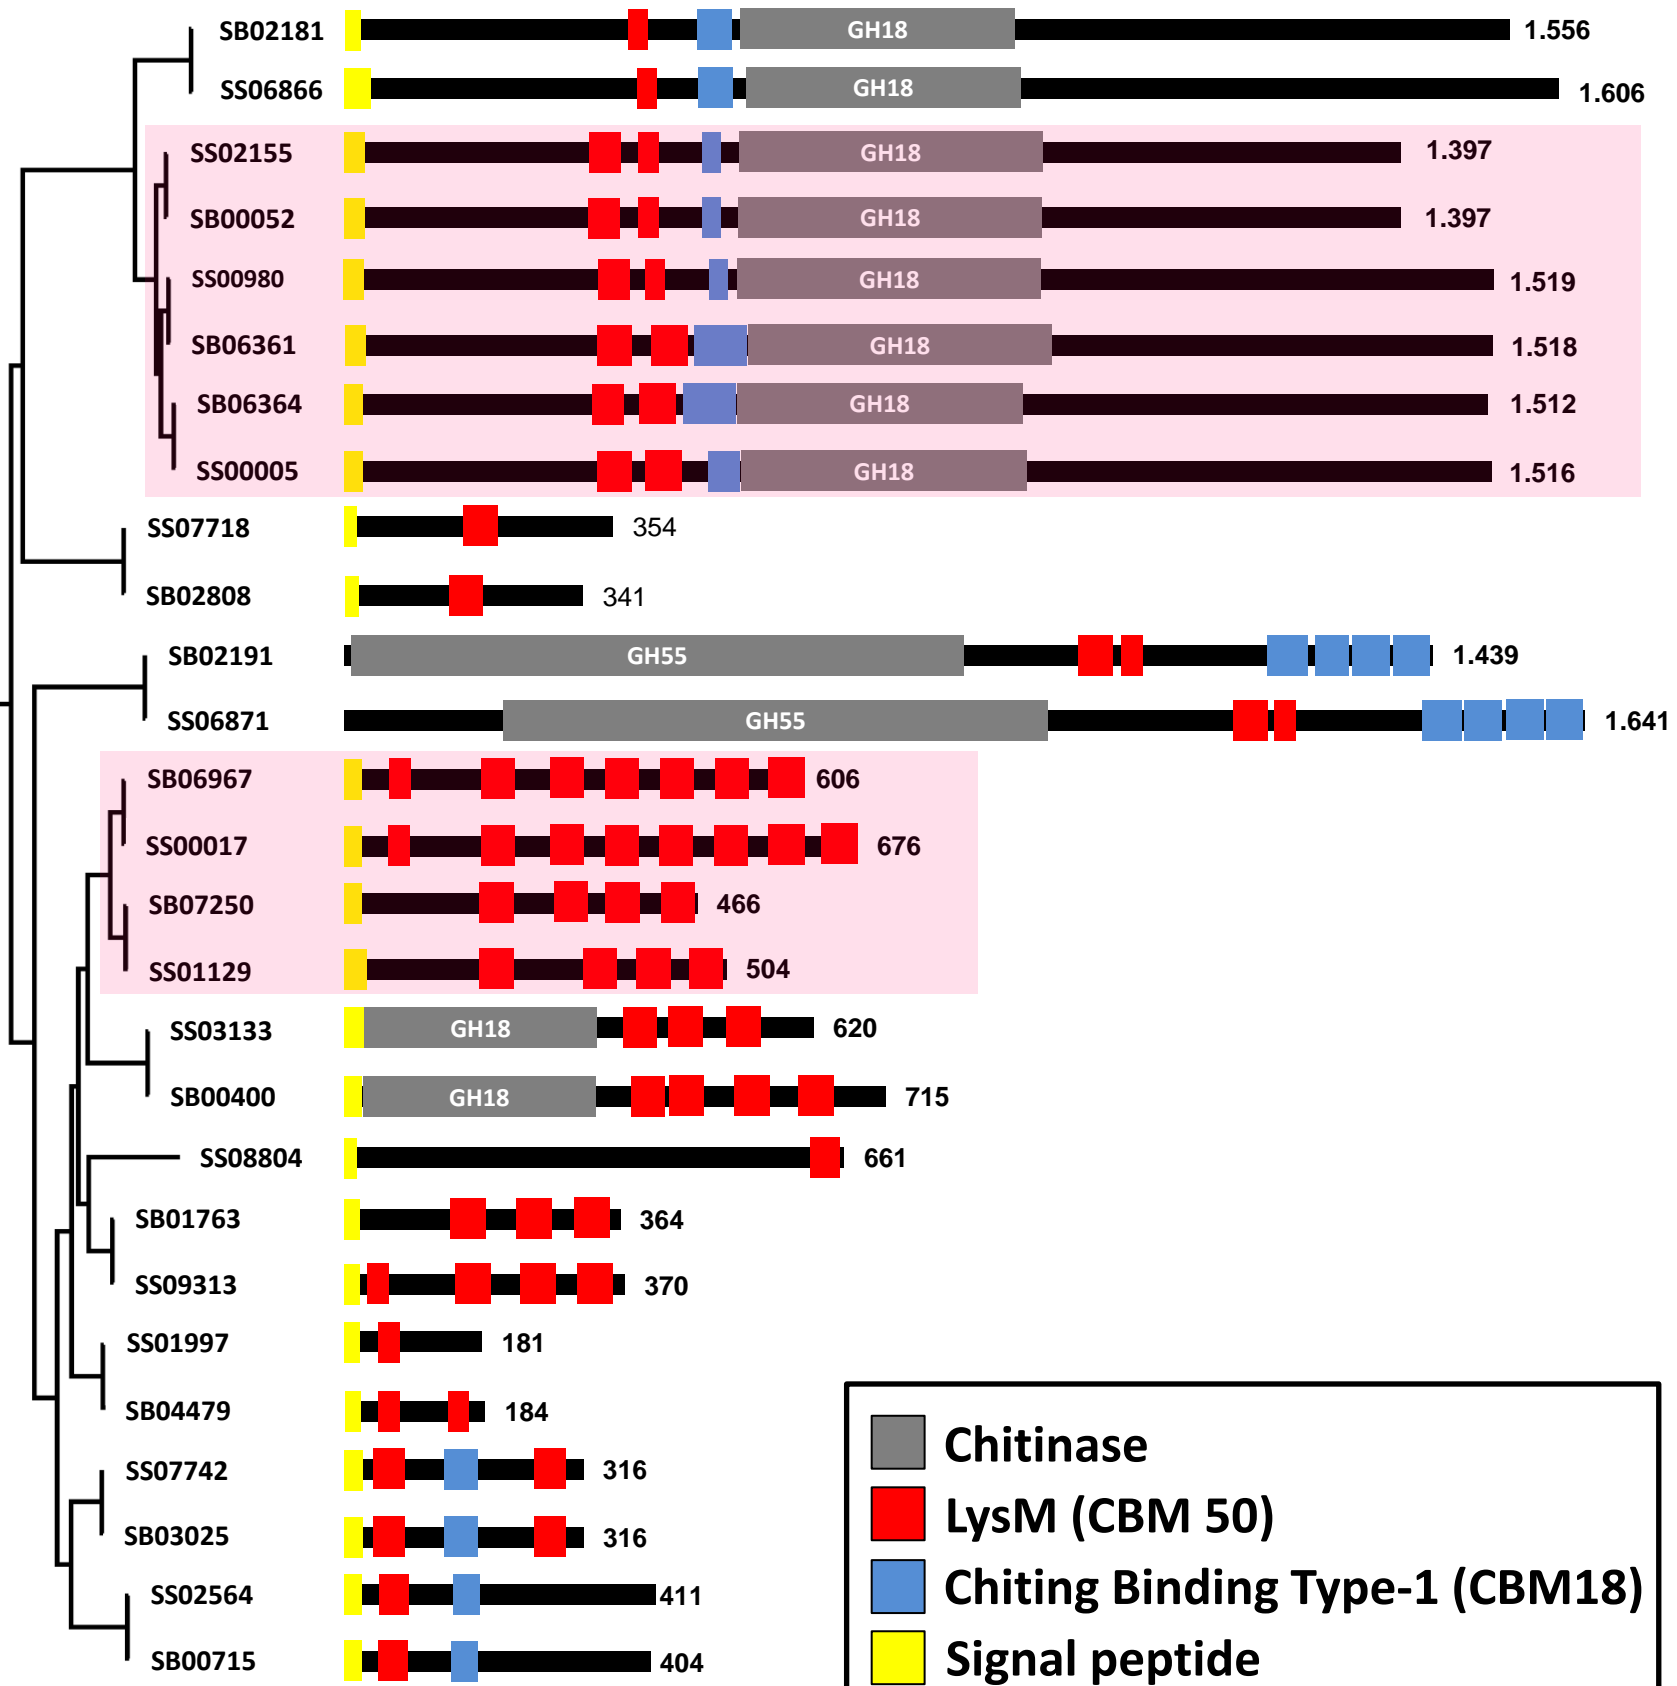

0.3

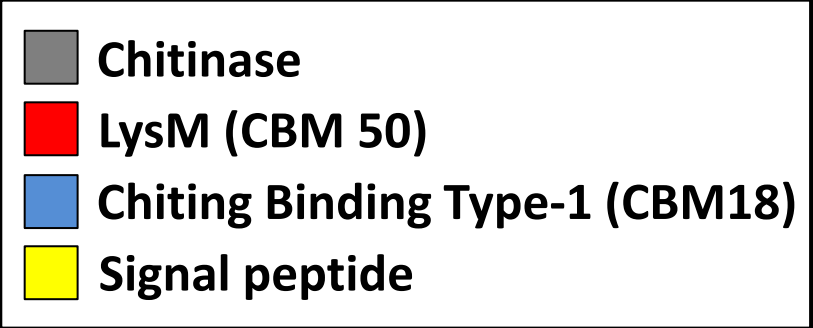

Supplement: 12864_2014_6638_MOESM3_ESM.pdf [file 12864_2014_6638_MOESM3_ESM.pdf]
