# Supplementary material for: Comparative genomics of the major fungal agents of human and animal Sporotrichosis: Sporothrix schenckii and Sporothrix brasiliensis
Source: PubMed Central journal article supplement (PMC4226871; doi:10.1186/1471-2164-15-943), 2014-10-29
Supplement: 12864_2014_6638_MOESM7_ESM.pdf [file 12864_2014_6638_MOESM7_ESM.pdf]

Rab GTPase  
 ML – 1.000 bootstraps  
 LG + G

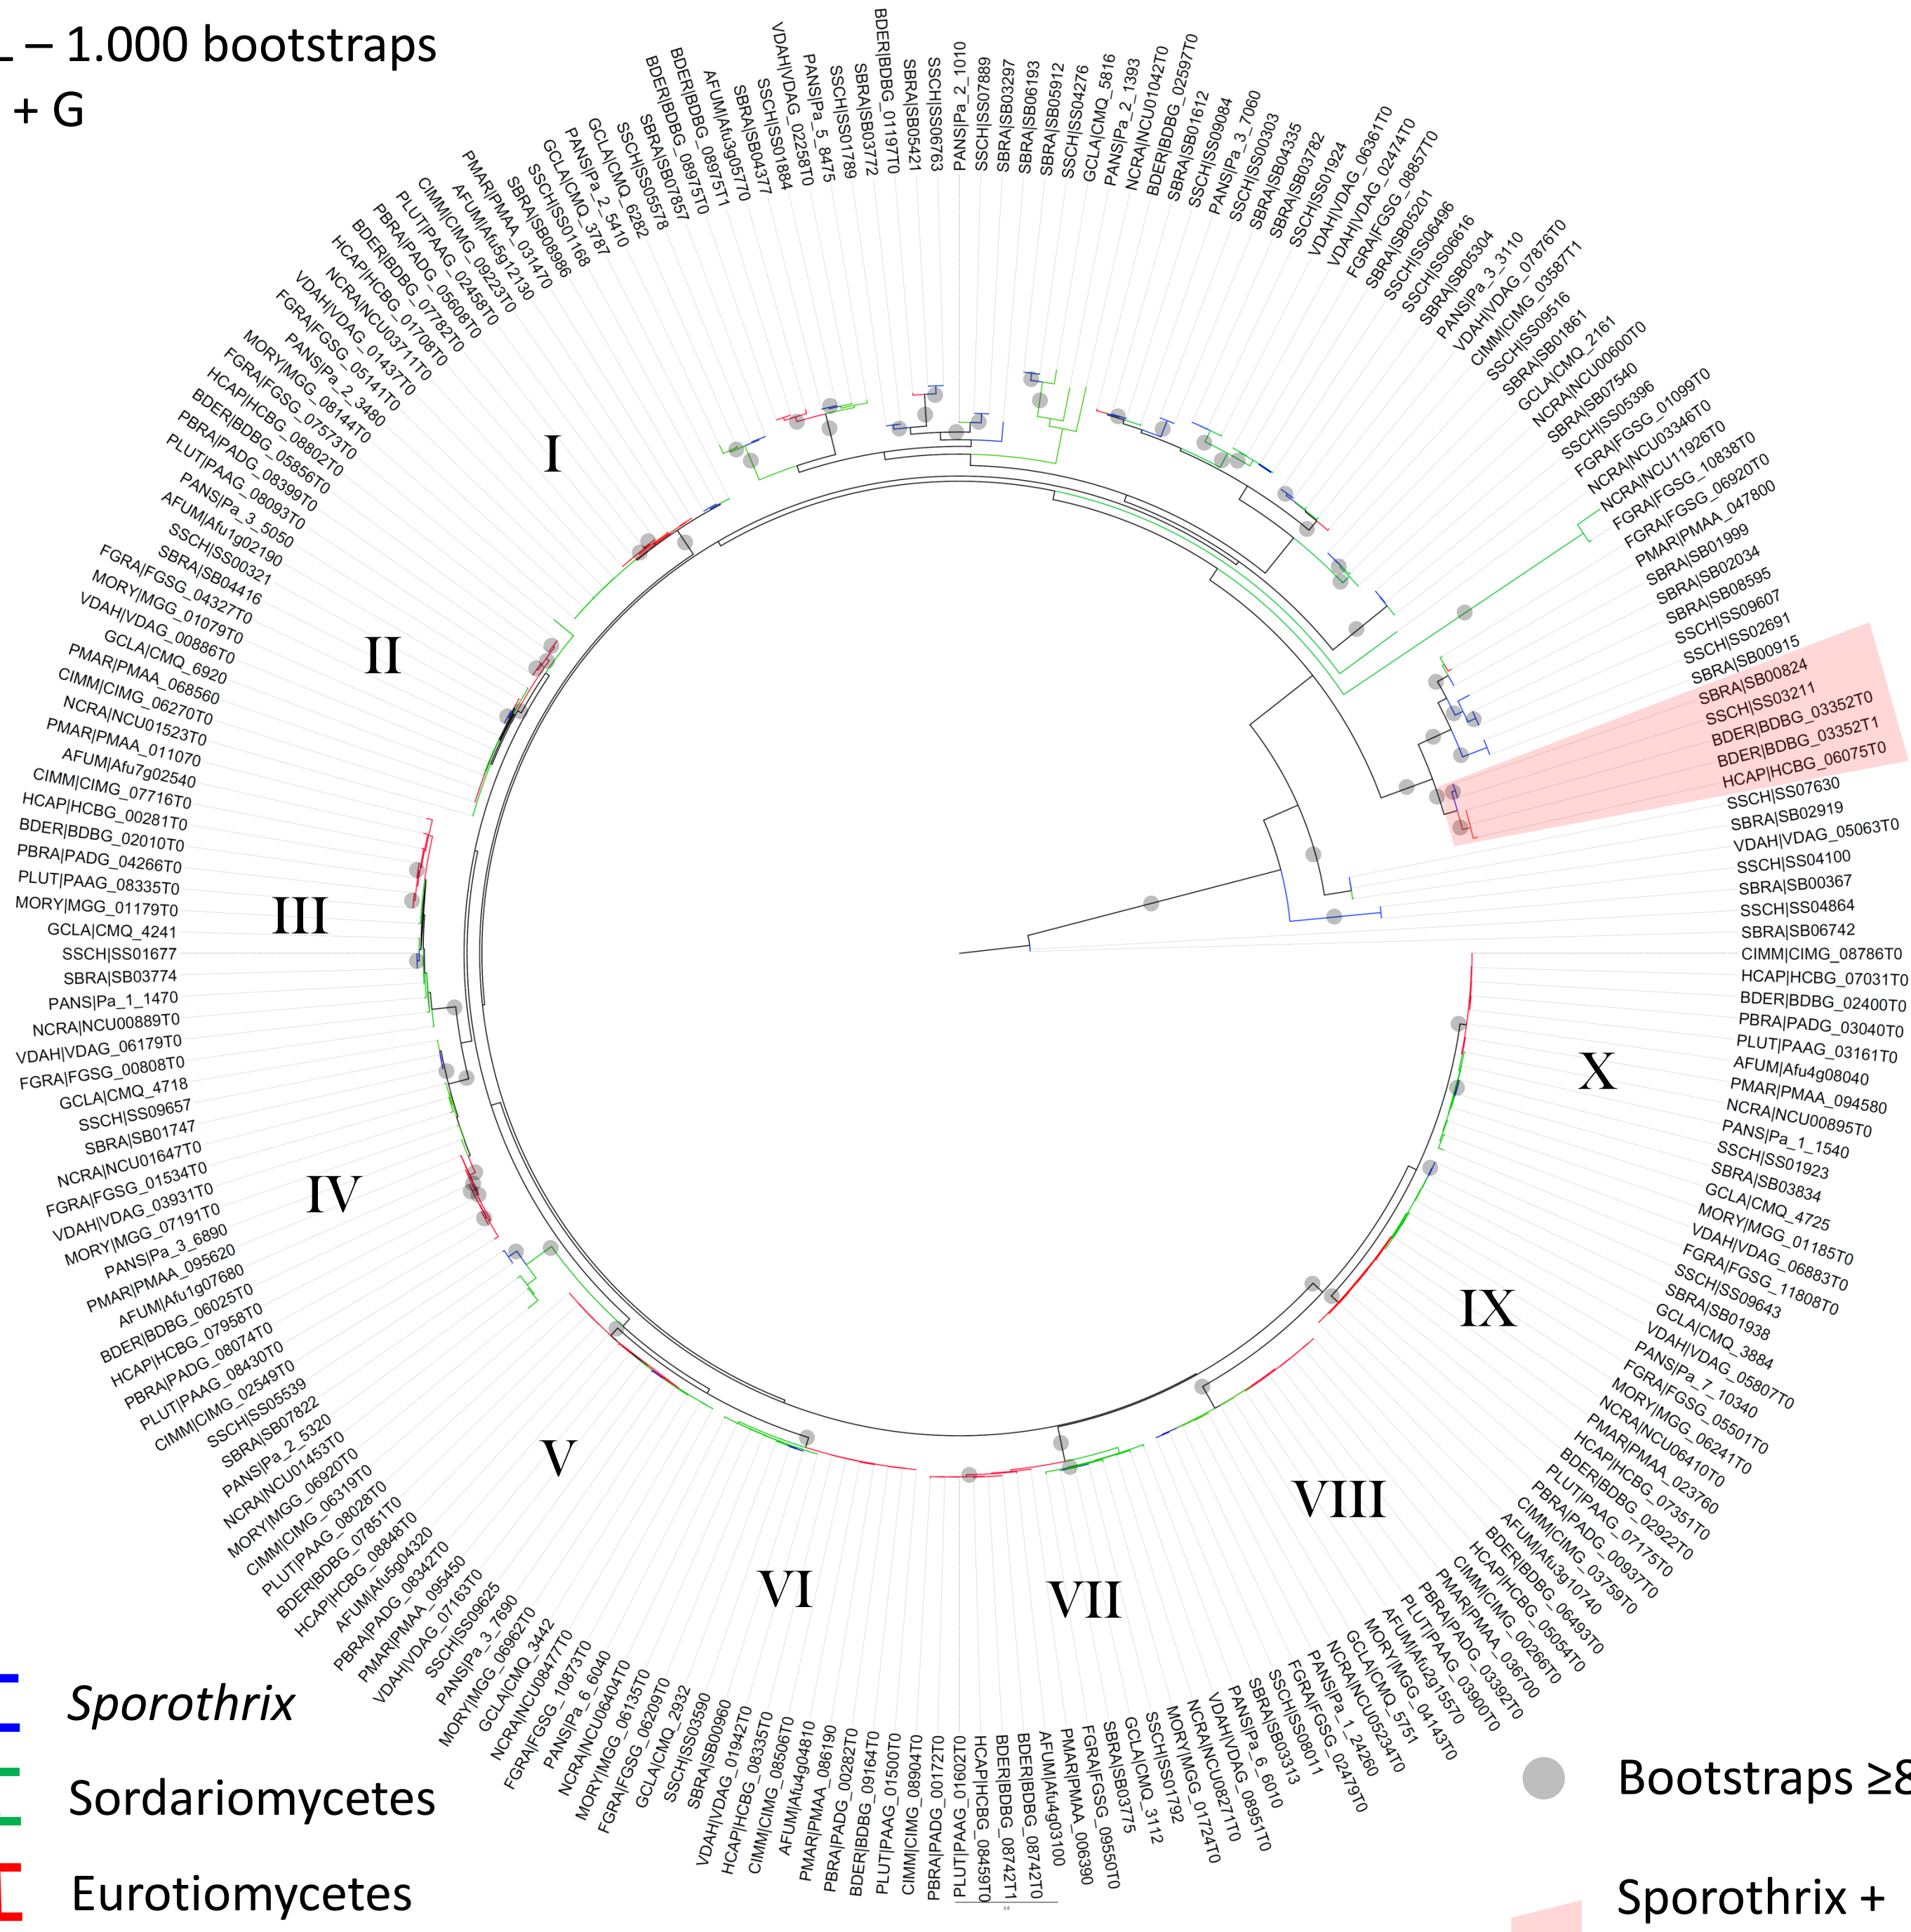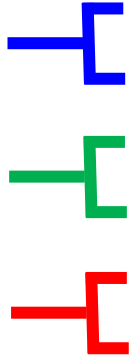

*Sporothrix*

Sordariomycetes

Eurotiomycetes

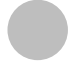

Boostraps  $\geq 80$

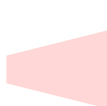

Sporothrix +  
Dimorphic fungi
